# Supplementary material for: Functional Characterization of Tomato ShROP7 in Regulating Resistance against Oidium neolycopersici
Source: MDPI journal article supplement (doi:10.3390/ijms23158557), 2022-08-02
Supplement: s1 [file s1]

1 **Supplementary Table S1.** DNA primers used in this study.

| Target gene name          | Primer name   | Sequence (5' to 3')                                   |
|---------------------------|---------------|-------------------------------------------------------|
| Gene cloning              | ShROP7-C-F    | ATGACTACTGCTAGATTCATCAAATGTG                          |
|                           | ShROP7-C-R    | TCATAGAATTGCACATAACGTCCTC                             |
| qPCR analysis             | ShROP7-Q-F    | CCAACACTCACCCTACACCTACTT                              |
|                           | ShROP7-Q-R    | CATTGCTTACACCACCCTTTTACT                              |
|                           | ShGAPDA-Q-F   | CTGGTGCTGACTTCGTTGTTG                                 |
|                           | ShGAPDA-Q-R   | GCTCTGGCTTGTATTCAATTCTCG                              |
|                           | ShPR1-F       | TCACAATGCAGCTCGTAGACAAGTT                             |
|                           | ShPR1-R       | TTCACCGTAAGGTCCACCAGAGT                               |
|                           | ShPR5-F       | CCTACACCGTTTGGGCAGCAT                                 |
|                           | ShPR5-R       | GCATGAACCTCTACCAGCACCATTA                             |
|                           | ShPDS1.2-F    | TGAATGGCACAGCAGTTGGTTCT                               |
|                           | ShPDS1.2-R    | TGTTCCATAATAGCAGCAGCCTCAA                             |
| VIGS                      | ShROP7-V-F    | agaaggcctccatgggatccATGTGGTGGTGGATG<br>GTAGCA         |
|                           | ShROP7-V-R    | cgtgagctcgggtaccggatccAGGAGTAGCCCCTG<br>GATGATCA      |
|                           | ShPDS-V-F     | gtaaggttaccgaattctctagaCAAGCAAGCCAGGA<br>GAAT         |
|                           | ShPDS-V-R     | tcgggacatgcccgggcctcgagGCAAGTGTGATGT<br>CCATAGTAT     |
|                           | ShROP7-S-F    | GCTCCAAGACTCAGCAGAATG                                 |
|                           | ShROP7-S-R    | TTTCTTCATCTTAGGGGGTCTG                                |
| Overexpression in tobacco | ShROP7-O-F    | agcatcgattcccgggtcgacATGACTACTGCTAGA<br>TTCATCAAATGTG |
|                           | ShROP7-O-R    | aaccgttcacggtcggtcgacTCATAGAATTGCACA<br>TAACGTCCTC    |
| Y2H                       | ShROP7-B-F    | aggcgaattcccgggatccATGACTACTGCTAGA<br>TTCATCAAATGTG   |
|                           | ShROP7-B-R    | ccgtgcaggtcgacggatccTCATAGAATTGCACA<br>TAACGTCCTC     |
| BIFC                      | ShROP7-cY-F   | tggcgcgccactagtggatccATGACTACTGCTAGA<br>TTCATCAAATGTG |
|                           | ShROP7-cY-R   | gacagtactatcgatggatccTAGAATTGCACATAA<br>CGTCCTC       |
|                           | ShSOBIR1-nY-F | cccaggcctactagtggatccATGACCTTCACAGCC<br>TCATATATACAC  |
|                           | ShSOBIR1-nY-F | accctcgaggtcgacggatccTTAATGCTTGATCTG<br>CATCAACATG    |

2 Note: The primer sequence is composed of two parts. The lowercase letters represent the  
3 sequences of corresponding vector homologous arm and restriction enzyme site, and the capital  
4 letters indicate the gene-specific nucleotide sequences.
